# Supplementary material for: Chronic Physiological Effects of Swim Training Interventions in Non-Elite Swimmers: A Systematic Review and Meta-Analysis
Source: Springer Nature journal article supplement (doi:10.1007/s40279-017-0805-0), 2017-10-30

**Electronic Supplementary Material files**

**Electronic Supplementary Material Table S1.** PubMed search algorithm and results

| **Search** | **Query** | **Items found** |
| --- | --- | --- |
| 27 | Search (25 NOT 26) | 5935 |
| 26 | Search (animals[MeSH Terms]) NOT humans[MeSH Terms] | 4301329 |
| 25 | Search (8 AND 25) | 15025 |
| 24 | Search (9 OR 10 OR 11 OR 12 OR 13 OR 14 OR 15 OR 16 OR 17 OR 18 OR 19 OR 20 OR 21 OR 22 OR 23) | 1815961 |
| 23 | Search physiolog* benefit*[Title/Abstract] | 65154 |
| 22 | Search long-term adaptation*[Title/Abstract] | 845 |
| 21 | Search long-term effect*[Title/Abstract] | 32949 |
| 20 | Search long-term response*[Title/Abstract] | 1828 |
| 19 | Search short-term effect*[Title/Abstract] | 7730 |
| 18 | Search short-term response*[Title/Abstract] | 973 |
| 17 | Search acute response*[Title/Abstract] | 2261 |
| 16 | Search acute effect*[Title/Abstract] | 13413 |
| 15 | Search chronic adaptation*[Title/Abstract] | 184 |
| 14 | Search physiolog* effect*[Title/Abstract] | 1315641 |
| 13 | Search chronic response*[Title/Abstract] | 339 |
| 12 | Search chronic effect*[Title/Abstract] | 4658 |
| 11 | Search physiolog* response*[Title/Abstract] | 713668 |
| 10 | Search physiolog* adaptation*[Title/Abstract] | 75601 |
| 9 | Search training effects[Title/Abstract] | 1592 |
| 8 | Search (1 OR 2 OR 5 OR 6 OR 7) | 47344 |
| 7 | Search aquatic sport*[Title/Abstract] | 56 |
| 6 | Search aquatic exercise*[Title/Abstract] | 247 |
| 5 | Search (3 AND 4) | 6286 |
| 4 | Search exercise*[Title/Abstract] | 239936 |
| 3 | Search (water*[Title/Abstract]) OR aquatic*[Title/Abstract] | 672775 |
| 2 | Search swim*[Title/Abstract] | 32301 |
| 1 | Search swimming[MeSH Terms] | 21270 |

**Electronic Supplementary Material Table S2.** List of excluded studies with reasons

| **Excluded study** | **Reason for exclusion** |
| --- | --- |
| Altintas et al. 2003 | Available in abstract form only |
| Dugue et al. 1998 | Available in abstract form only |
| Niedoszytko et al. 2009 | Available in abstract form only |
| Cade et al. 1991 | Effects of swimming could not be isolated (dietary intervention) |
| Lamb et al. 1990 | Effects of swimming could not be isolated (dietary intervention) |
| Dugue et al. 2000 | Effects of swimming could not be isolated (from sauna) |
| Svenonius 1983 | Effects of swimming could not be isolated (swimming + other exercise) |
| Noland et al. 2001 | Included collegiate swimmers |
| Valentine and Evans 2001 | Included collegiate swimmers |
| Fitts et al. 1989 | Included collegiate swimmers |
| Greenwood et al. 2008 | Included collegiate swimmers |
| Skorski et al. 2012 | Included competitive swimmers |
| Rodríguez et al. 2016 | Included competitive swimmers |
| Pelarigo et al. 2016 | Included elite swimmers |
| Deligiannis et al. 1993 | Included elite swimmers |
| Houston et al. 1981 | Included elite swimmers |
| Mougios et al. 1993 | Included elite swimmers |
| Arnett et al. 2002 | Included elite swimmers |
| Fu et al. 2002 | Included elite swimmers |
| Hirvonen et al. 2002 | It did not investigate effects of pool swimming (cold water swimming) |
| Hermanussen et al. 1995 | It did not investigate effects of pool swimming (cold water swimming) |
| Huttunen et al. 2001 | It did not investigate effects of pool swimming (cold water swimming) |
| Lubkowska et al. 2013 | It did not investigate effects of pool swimming (cold water swimming) |
| Gibas-Dorna et al. 2016 | It did not investigate effects of pool swimming (cold water swimming) |
| Huttunen et al.2004 | It did not investigate effects of pool swimming (cold water swimming) |
| Tomas-Carus et al. 2008 | It did not investigate effects of swimming (aqua exercise) |
| Teleglow et al. 2016 | It did not investigate effects of swimming (bathing) |
| McMurray et al. 1994 | It did not investigate effects of swimming (cycling underwater) |
| McMurray et al. 1993 | It did not investigate effects of swimming (cycling underwater) |
| Bermingham et al. 2004 | It did not investigate effects of swimming (cycling underwater) |
| Dugue and Leppanen 2005 | It did not investigate effects of swimming (immersion) |
| Smolander et al. 2009 | It did not investigate effects of swimming (immersion) |
| Sutkowy et al. 2015 | It did not investigate effects of swimming (immersion) |
| Fujimoto et al. 2016 | It did not investigate effects of swimming (immersion) |
| Herstgard et al 1992 | It did not investigate effects of swimming (play) |
| Volaklis et al. 2007 | It did not investigate effects of swimming (water & resistance exercise) |
| Lombardi et al. 2011 | Wrong study design, acute cold water swimming bout study |
| Siems and Brenke1992 | Wrong study design, acute cold water swimming bout study |
| Siems et al. 1999 | Wrong study design, acute cold water swimming bout study |
| Tipton et al. 1999 | Wrong study design, acute cold water swimming bout study |
| Zenner et al. 1980 | Wrong study design, acute cold water swimming bout study |
| Atsumi et al. 2008 | Wrong study design, acute swimming bout study |
| Grace et al. 1987 | Wrong study design, acute swimming bout study |
| Morgan and Shenoi 1989 | Wrong study design, acute swimming bout study |
| Boning et al. 1988 | Wrong study design, acute swimming bout study |
| Dixon and Faulkner 1975 | Wrong study design, acute swimming bout study |
| Galbo et al. 1979 | Wrong study design, acute swimming bout study |
| Holmer et al. 1972 | Wrong study design, acute swimming bout study |
| Holmer and Bergh1974 | Wrong study design, acute swimming bout study |
| Lakin et al. 2013 | Wrong study design, acute swimming bout study |
| Ueda et al. 1995 | Wrong study design, acute swimming bout study |
| Viti et al. 1989 | Wrong study design, acute swimming bout study |
| Weiss et al. 1988 | Wrong study design, acute swimming bout study |
| McMurray et al. 1991 | Wrong study design, acute swimming bout study |
| Spinnewijn et al. 1996 | Wrong study design, acute swimming bout study |
| Sasaki et al. 1993 | Wrong study design, acute swimming bout study |
| Bucking and Krey 1986 | Wrong study design, acute swimming bout study |
| Fletcher et al. 1979 | Wrong study design, acute swimming bout study |
| Heigenhausen et al. 1977 | Wrong study design, acute swimming bout study |
| Lehmann and Samek 1990 | Wrong study design, acute swimming bout study |
| Madger et al. 1981 | Wrong study design, acute swimming bout study |
| Meyer et al. 2004 | Wrong study design, acute swimming bout study |
| Schmid et al. 2007 | Wrong study design, acute swimming bout study |
| Sideravičiūtė et al. 2006 | Wrong study design, no non-swimming comparison group |
| Lavin et al. 2015 | Wrong study design, no non-swimming comparison group |
| Soultanakis et al. 2012 | Wrong study design, no non-swimming comparison group |
| Bemanian et al. 2009 | Wrong study design, no non-swimming comparison group |
| Fitch et al. 1976 | Wrong study design, no non-swimming comparison group |
| Gonenc et al. 2000 | Wrong study design, single group study |
| Chen et al. 2010 | Wrong study design, single group study |

**Electronic Supplementary Material Figure S1.** Risk of bias summary: review authors' judgements about each risk of bias item for each included study.

**
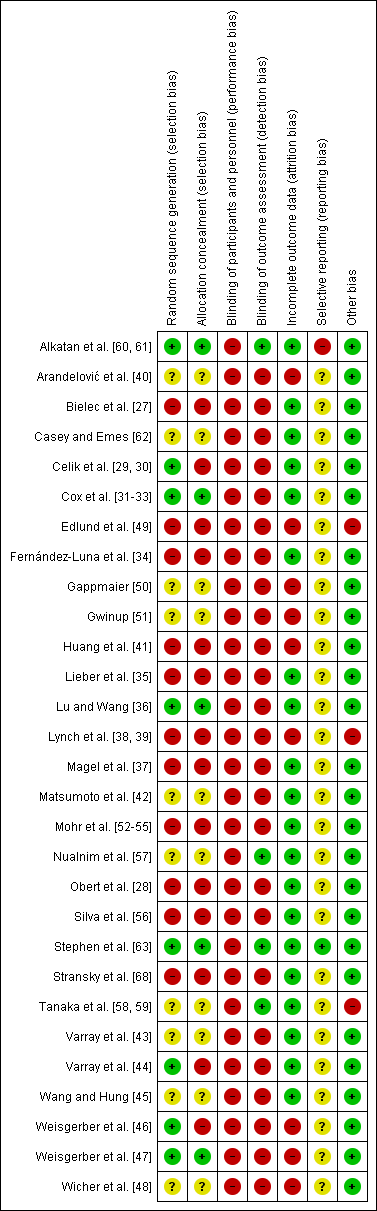
**

**Electronic Supplementary Material Table S3.** Cardiorespiratory fitness, muscular strength and resting cardiovascular measures: meta-analysis results

| **Outcome or subgroup** | **Populations included** | **Comparison** | **N studies** | **N participants** | **MD/SMD (95% CI)** |
| --- | --- | --- | --- | --- | --- |
| **Cardiorespiratory fitness outcomes** | | | | | |
| Relative VO2max in ml/kg/min (combined values) | Healthy children/adolescents; children/adolescents with asthma; children/adolescents with cystic fibrosis; healthy adults; adults with hypertension | Swimming vs. control | 9 studies [28, 29, 35, 37, 43, 44, 49, 57, 68] | 208 | MD 6.32 (4.33, 8.31)  I2 = 55% |
| Relative VO2max in ml/kg/min (combined values) | Healthy children/adolescents | Swimming vs. control | 2 studies [28, 68] | 44 | MD 7.93 (3.31, 12.55)  I2 = 0% |
| Relative VO2max in ml/kg/min (post-intervention values) | Children/adolescents with asthma | Swimming vs. control | 2 studies [43, 44] | 32 | MD 9.67 (5.84, 13.51)  I2 = 0% |
| Relative VO2max in ml/kg/min (combined values) | Healthy adults | Swimming vs. control | 3 studies [29, 35, 37] | 77 | MD 5.87 (2.93, 8.81)  I2 = 76% |
| Relative VO2max in ml/kg/min (combined values) | Healthy adults | Swimming vs. running | 2 studies [29, 35] | 48 | MD -1.48 (-3.65, 0.69)  I2 = 12% |
| Absolute VO2max in L/min (combined values) | Healthy children/adolescents; healthy adults | Swimming vs. control | 3 studies [28, 37, 68] | 74 | MD 0.41 (0.27, 0.55)  I2 = 22% |
| Absolute VO2max in L/min (combined values) | Healthy children/adolescents | Swimming vs. control | 2 studies [28, 68] | 44 | MD 0.30 (0.12, 0.48)  I2 = 0% |
| Maximal VE (post-intervention values) | Healthy children/adolescents; children/adolescents with asthma; healthy adults | Swimming vs. control | 4 studies [28, 37, 43, 68] | 88 | SMD 0.61 (0.17, 1.05)  I2 = 0% |
| Maximal VE (post-intervention values) | Healthy children/adolescents | Swimming vs. control | 2 studies [28, 68] | 44 | SMD 0.59 (-0.11, 1.29)  I2 = 15% |
| Maximal RER (combined values) | Healthy children/adolescents; healthy adults | Swimming vs. control | 3 studies [28, 35, 37] | 68 | MD 0.06 (-0.02, 0.14)  I2 = 74% |
| Maximal RER (change values) | Healthy adults | Swimming vs. control | 2 studies [35, 37] | 54 | MD 0.08 (-0.04, 0.19)  I2 = 77% |
| Maximal heart rate in bpm (combined values) | Healthy children/adolescents; children/adolescents with asthma; healthy adults | Swimming vs. control | 5 studies [28, 35, 37, 43, 68] | 112 | MD 1.70 (-6.32, 9.73)  I2 = 81% |
| Maximal heart rate in bpm (combined values) | Healthy children/adolescents | Swimming vs. control | 2 studies [28, 68] | 44 | MD 4.16 (-7.61, 15.92)  I2 = 0% |
| Maximal heart rate in bpm (change values) | Healthy adults | Swimming vs. control | 2 studies [35, 37] | 54 | MD -3.91 (-11.05, 3.22)  I2 = 75% |
| Maximal O2 pulse (post-intervention values) | Healthy children/adolescents; children/adolescents with asthma | Swimming vs. control | 2 studies [28, 43, 68] | 58 | SMD 1.02 (-0.39, 1.65)  I2 = 14% |
| Maximal O2 pulse (post-intervention values) | Healthy children/adolescents | Swimming vs. control | 2 studies [28, 68] | 44 | SMD 1.26 (0.30, 2.23)  I2 = 40% |
| Submaximal exercise (post-intervention values) | Children/adolescents with asthma; healthy adults; pregnant women; adults with hypertension | Swimming vs. control | 7 studies [35, 38, 42-44, 52, 58] | 208 | SMD 0.64 (0.14, 1.13)  I2 = 61% |
| Exercise performance at threshold intensity (post-intervention values) | Children/adolescents with asthma | Swimming vs. control | 3 studies [42-44] | 48 | SMD 1.40 (0.56, 2.25)  I2 = 38% |
| Heart rate response to submaximal exercise intensity (post-intervention values) | Adults with hypertension | Swimming vs. control | 2 studies [52, 59] | 105 | SMD 0.41 (-0.25, 1.07)  I2 = 62% |
| Maximal exercise time in mins (post-intervention values) | Children/adolescents with cystic fibrosis; healthy adults | Swimming vs. control | 2 studies [37, 49] | 50 | MD 4.27 (2.11, 6.42)  I2 = 0% |
| **Muscular strength** | | | | | |
| Quadriceps peak torque in nM/kg (post-intervention values) | Healthy adults | Swimming vs. control | 2 studies [29, 36] | 65 | MD 0.35 (-6.34, 7.03)  I2 = 0% |
| Quadriceps peak torque in nM/kg (post-intervention values) | Healthy adults | Swimming vs. walking | 2 studies [29, 36] | 68 | MD -0.19 (-12.73, 12.34)  I2 = 32% |
| Quadriceps peak torque in nM/kg (post-intervention values) | Healthy adults | Swimming vs. running | 2 studies [29, 36] | 67 | MD -11.86 (-31.51, 7.78)  I2 = 46% |
| **Resting cardiovascular measures** | | | | | |
| Resting heart rate in bpm (post-intervention values) | Adults with hypertension | Swimming vs. control | 3 studies [52, 57, 59] | 123 | MD -1.57 (-5.04, 1.89)  I2 = 0% |
| Resting heart rate in bpm (combined values) | Healthy women/women with obesity | swimming vs. waking | 2 studies [32, 50] | 122 | MD -0.43 (-1.96, 1.10)  I2 = 0% |
| Systolic blood pressure in mmHg (post-intervention values) | Adults with hypertension | swimming vs. control | 3 studies [52, 57, 59] | 123 | MD -0.09 (-6.29, 6.11)  I2 = 16% |
| Diastolic blood pressure in mmHg (post-intervention values) | Adults with hypertension | swimming vs. control | 3 studies [52, 57, 59] | 123 | MD 0.60 (-2.92, 4.13)  I2 = 26% |
| Mean arterial pressure in mmHg (post-intervention values) | Adults with hypertension | swimming vs. control | 3 studies [52, 57, 59] | 123 | MD -0.93 (-6.37, 4.50)  I2 = 59% |

**Key:** MD: mean difference; SMD: standardised mean difference; VO2max: maximal oxygen uptake; combined values: post-intervention and change from baseline to end of intervention values combined; VE: minute ventilation; RER: respiratory exchange ratio; change values: change from baseline to end of intervention values.

**Electronic Supplementary Material Table S4.** Blood biomarkers, anthropometric and body composition measures: meta-analysis results

| **Outcome or subgroup** | **Populations included** | **Comparison** | **N studies** | **N participants** | **MD/SMD (95% CI)** |
| --- | --- | --- | --- | --- | --- |
| **Blood biomarker outcomes** | | | | | |
| Total Cholesterol in mmol/L (post-intervention values) | Adults with hypertension | Swimming vs. control | 3 studies [52, 57, 58] | 123 | MD -0.14 (-0.79, 0.50)  I2 = 59% |
| LDL-Cholesterol in mmol/L (post-intervention values) | Adults with hypertension | Swimming vs. control | 3 studies [52, 57, 58] | 123 | MD -0.07 (-0.69, 0.55)  I2 = 30% |
| HDL-Cholesterol in mmol/L (post-intervention values) | Adults with hypertension | Swimming vs. control | 3 studies [52, 57, 58] | 123 | MD 0.05 (-0.31, 0.41)  I2 = 77% |
| Triglycerides in mmol/L (post-intervention values) | Adults with hypertension | Swimming vs. control | 3 studies [52, 57, 58] | 123 | MD -0.11 (-0.44, 0.23)  I2 = 0% |
| Glucose in mmol/L (post-intervention values) | Adults with hypertension | Swimming vs. control | 2 studies [57, 58] | 61 | MD -0.26 (-0.53, 0.01)  I2 = 0% |
| **Anthropometric and body composition outcomes** | | | | | |
| Body mass in kg (combined values) | Healthy children/adolescents; children/adolescents with cystic fibrosis; healthy adults; pregnant women; adults with hypertension | Swimming vs. control | 10 studies [27, 28, 35, 38, 49, 52, 56-58, 68] | 500 | MD -2.90 (-5.02, -0.78)  I2 = 90% |
| Body mass in kg (combined values) | Healthy children/adolescents | Swimming vs. control | 3 studies [27, 28, 68] | 274 | MD -4.45 (-9.29, 0.38)  I2 = 87% |
| Body mass in kg (combined values) | Adults with hypertension | Swimming vs. control | 4 studies [52, 56-58] | 149 | MD -3.45 (-10.52, 3.63)  I2 = 93% |
| Body mass in kg (change values) | Healthy women/women with obesity | Swimming vs. walking | 3 studies [31, 50, 51] | 141 | MD 2.17 (-4.17, 8.52)  I2 = 97% |
| BMI in kg/m2 (post-intervention values) | Healthy children/adolescents; healthy adults; adults with hypertension | Swimming vs. control | 6 studies [27, 29, 36, 56-58] | 382 | MD -0.84 (-2.02, 0.33)  I2 = 91% |
| BMI in kg/m2 (post-intervention values) | Healthy adults | Swimming vs. control | 2 studies [29, 36] | 65 | MD -0.28 (-1.53, 0.97)  I2 = 62% |
| BMI in kg/m2 (post-intervention values) | Adults with hypertension | Swimming vs. control | 3 studies [56-58] | 87 | MD -1.11 (-4.49, 2.28)  I2 = 89% |
| BMI in kg/m2 (post-intervention values) | Healthy adults | Swimming vs. walking | 2 studies [31, 36] | 143 | MD 0.33 (-0.54, 1.21)  I2 = 36% |
| BMI in kg/m2 (post-intervention values) | Healthy adults | Swimming vs. running | 2 studies [31, 36] | 68 | MD 1.18 (0.54, 1.81)  I2 = 0% |
| BMI in kg/m2 (post-intervention values) | Healthy adults | Swimming vs. cycling | 2 studies [29, 36] | 67 | MD 1.34 (-0.16, 2.84)  I2 = 68% |
| Body fat % (combined values) | Healthy children/adolescents; healthy adults; adults with hypertension | Swimming vs. control | 7 studies [28, 35, 29, 52, 57, 58, 68] | 216 | MD -1.92 (-3.25, -0.60)  I2 = 6% |
| Body fat % (post-intervention values) | Healthy children/adolescents | Swimming vs. control | 2 studies [28, 68] | 44 | MD -1.92 (-4.64, -0.80)  I2 = 0% |
| Body fat % (combined values) | Healthy adults | Swimming vs. control | 2 studies [35, 72] | 49 | MD -1.86 (-5.46, 1.74)  I2 = 68% |
| Body fat % (post-intervention values) | Adults with hypertension | Swimming vs. control | 3 studies [52, 57, 58] | 123 | MD -1.71 (-4.43, 1.01)  I2 = 32% |
| Body fat % (combined values) | Healthy women/women with obesity | Swimming vs. walking | 2 studies [35, 50] | 122 | MD -0.87 (-3.01, 1.28)  I2 = 0% |
| Body fat % (combined values) | Healthy adults | Swimming vs. running | 2 studies [31, 35] | 46 | MD 0.03 (-7.40, 7.46)  I2 = 88% |
| Lean mass in kg (combined values) | Healthy children/adolescents; healthy adults; adults with hypertension | Swimming vs. control | 6 studies [28, 35, 52, 57, 58, 68] | 191 | MD 1.96 (0.21, 3.71)  I2 = 77% |
| Lean mass in kg (post-intervention values) | Healthy children/adolescents | Swimming vs. control | 2 studies [28, 68] | 44 | 0.58 (-1.82, 2.98)  I2 = 0% |
| Lean mass in kg (post-intervention values) | Adults with hypertension | Swimming vs. control | 3 studies [52, 57, 58] | 123 | MD 3.84 (-0.23, 7.90)  I2 = 88% |
| Waist circumference in cm (post-intervention values) | Adults with hypertension | Swimming vs. control | 2 studies [52, 58] | 80 | MD 4.03 (2.58, 5.49)  I2 = 0% |
| Waist circumference in cm (combined values) | Healthy women/women with obesity | Swimming vs. walking | 2 studies [31, 50] | 122 | MD -1.41 (-3.71, 0.89)  I2 = 0% |
| Hip circumference in cm (combined values) | Adults with hypertension | Swimming vs. control | 2 studies [52, 58] | 80 | MD 0.99 (-3.20, 5.17)  I2 = 0% |
| Hip circumference in cm (combined values) | Healthy women/women with obesity | Swimming vs. walking | 2 studies [31, 50] | 122 | MD 0.09 (-1.77, 1.95)  I2 = 0% |
| Thigh circumference in cm (combined values) | Healthy women/women with obesity | Swimming vs. walking | 2 studies [31, 50] | 122 | MD 0.77 (-0.63, 2.17)  I2 = 0% |

**Key:** MD: mean difference; SMD: standardised mean difference; LDL: low-density lipoproteins; HDL: high-density lipoproteins; combined values: post-intervention and change from baseline to end of intervention values combined; change values: change from baseline to end of intervention values; BMI: body mass index.

**Electronic Supplementary Material Table S5.** Lung function measures: meta-analysis results

| **Outcome or subgroup** | **Populations included** | **Comparison** | **N studies** | **N participants** | **MD/SMD (95% CI)** |
| --- | --- | --- | --- | --- | --- |
| FEV1 (combined values) in L | Children/adolescents with cystic fibrosis; children/adolescents with asthma; adults with asthma; healthy adults | Swimming vs. control | 7 studies [34, 40, 43, 45, 46, 48, 49] | 240 | MD 0.07 (-0.07, 0.21)  I2 = 36% |
| FEV1 (combined values) in L | Children/adolescents with asthma | Swimming vs. control | 4 studies [43, 45, 46, 48] | 113 | MD 0.09 (-0.04, 0.22)  I2 = 31% |
| FEV1 % predicted (combined values) | Children/adolescents with asthma | Swimming vs. control | 3 studies [45, 46, 48] | 99 | MD 4.12 (-15.53, 21.78)  I2 = 88% |
| FVC (combined values) in L | Healthy children/adolescents; children/adolescents with cystic fibrosis; children/adolescents with asthma; adults with asthma; healthy adults | Swimming vs. control | 8 studies [34, 40, 43, 45, 46, 48, 49, 68] | 270 | MD 0.08 (-0.04, 0.21)  I2 = 33% |
| FVC (combined values) in L | Children/adolescents with asthma | Swimming vs. control | 4 studies [43, 45, 46, 48] | 113 | MD 0.10 (-0.06, 0.26)  I2 = 57% |
| FVC % predicted (change values) | Children/adolescents with asthma | Swimming vs. control | 3 studies [45, 46, 48] | 99 | MD 2.67 (-4.18, 9.53)  I2 = 55% |
| FEV1/FVC (post-intervention values) | Children/adolescents with asthma; adults with asthma | Swimming vs. control | 3 studies [40, 45, 48] | 156 | SMD 0.10 (-0.23, 0.42)  I2 = 0% |
| FEV1/FVC (post-intervention values) | Children/adolescents with asthma | Swimming vs. control | 2 studies [45, 48] | 91 | SMD -0.01 (-0.42, 0.41)  I2 = 0% |
| FEF25-75% % predicted (change values) | Children/adolescents with asthma | Swimming vs. control | 3 studies [45, 46, 48] | 99 | MD 11.07 (-1.17, 23.30)  I2 = 46% |
| Peak expiratory flow (post-intervention values) in L/min | Children/adolescents with asthma; healthy adults | Swimming vs. control | 3 studies [40, 45, 46] | 103 | MD 58.74 (29.70, 87.78)  I2 = 39% |
| Peak expiratory flow (post-intervention values) in L/min | Children/adolescents with asthma | Swimming vs. control | 2 studies [45, 46] | 38 | MD 63.49 (25.01, 101.97)  I2 = 52% |

**Key:** MD: mean difference; SMD: standardised mean difference; combined values: post-intervention and change from baseline to end of intervention values combined; change values: change from baseline to end of intervention values; FEV1: forced expiratory flow in 1 sec; FEV1% predicted: FEV1% of the patient divided by the average FEV1% in the population for any person of similar age, sex and body composition; FVC: forced vital capacity; FVC % predicted: FVC expressed as a percentage of the predicted normal for a person of the same sex, age and height; FEF25-75% % predicted: the patients forced expiratory flow at 25-75% (FEF25-75%) of the pulmonary volume divided by the average FEF25-75% in the population for any person of similar age, sex and body composition.

**Electronic Supplementary Material Figure S2.** Effect of swimming versus other exercise modes on relative maximal oxygen uptake (VO2max, ml/kg/min) (combined change from baseline to end of intervention and post-intervention follow-up values analysis). (SD: standard deviation, IV: inverse variance, CI: confidence interval, change values: change from baseline to end of intervention)


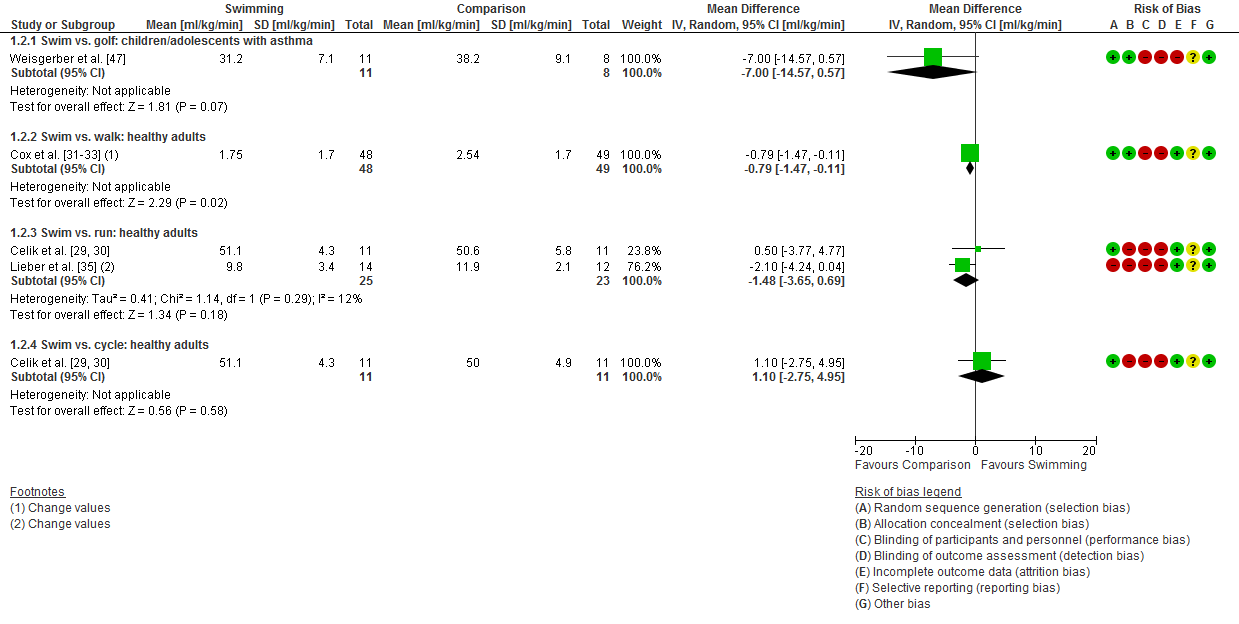


**Electronic Supplementary Material Figure S3.** Effect of swimming versus control on absolute maximal oxygen uptake (VO2max, L/min) (combined change from baseline to end of intervention and post-intervention follow-up values analysis). (SD: standard deviation, IV: inverse variance, CI: confidence interval, change values: change from baseline to end of intervention)


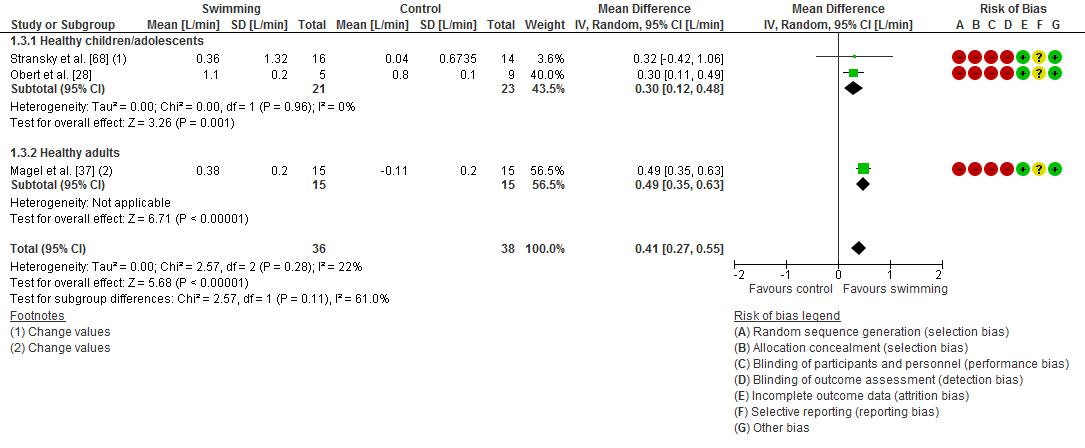


**Electronic Supplementary Material Figure S4.** Effect of swimming versus control on maximal minute ventilation (VEmax) (post-intervention follow-up values analysis). (SD: standard deviation, IV: inverse variance, CI: confidence interval, std. mean difference: standardised mean difference)


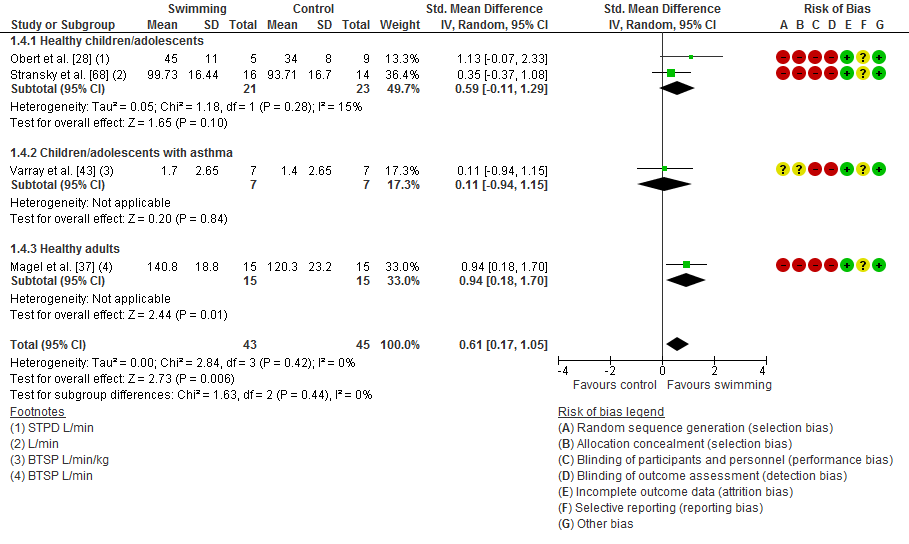


**Electronic Supplementary Material Figure S5.** Effect of swimming versus control on respiratory exchange ratio (RER) (combined change from baseline to end of intervention and post-intervention follow-up values analysis). (SD: standard deviation, IV: inverse variance, CI: confidence interval, change values: change from baseline to end of intervention)


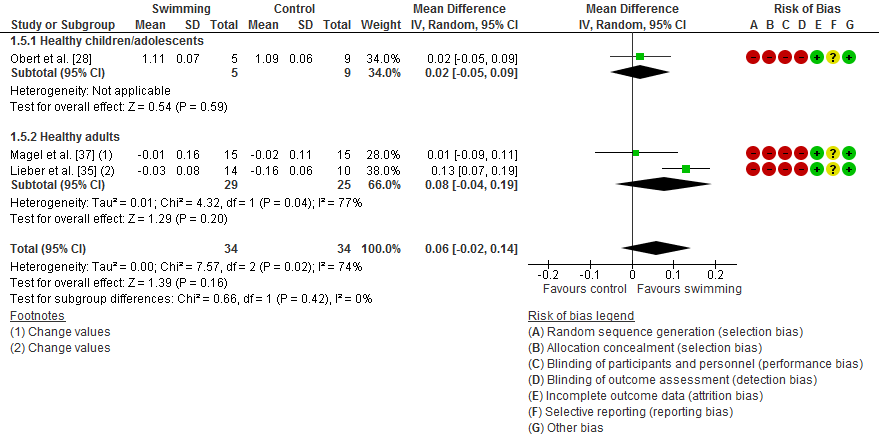


**Electronic Supplementary Material Figure S6.** Effect of swimming versus control on maximal heart rate (HRmax in bpm) (combined change from baseline to end of intervention and post-intervention follow-up values analysis). (SD: standard deviation, IV: inverse variance, CI: confidence interval, change values: change from baseline to end of intervention)


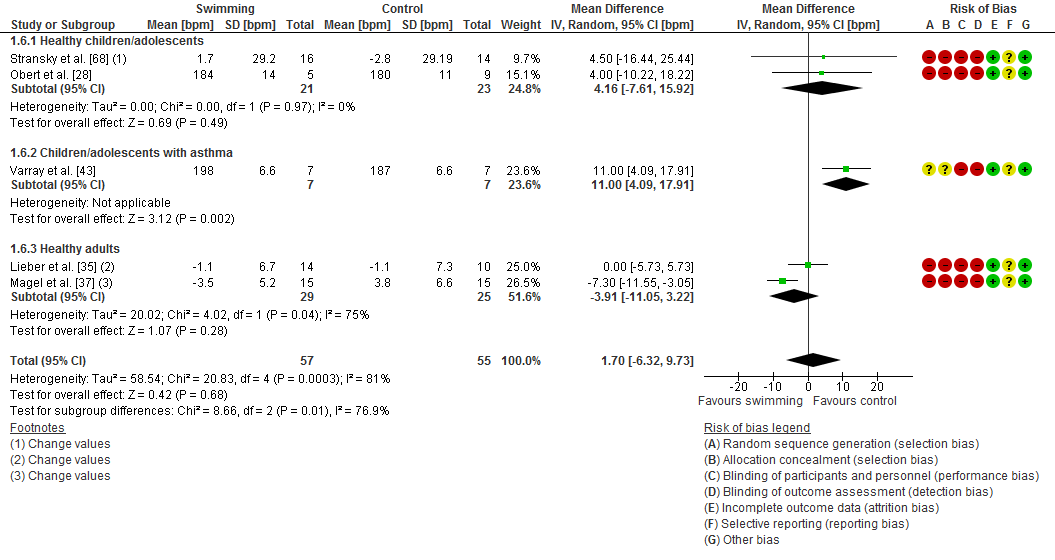


**Electronic Supplementary Material Figure S7.** Effect of swimming versus control on maximal oxygen pulse (O2 pulse) (post-intervention follow-up values analysis). (SD: standard deviation, IV: inverse variance, CI: confidence interval, std. mean difference: standardised mean difference)


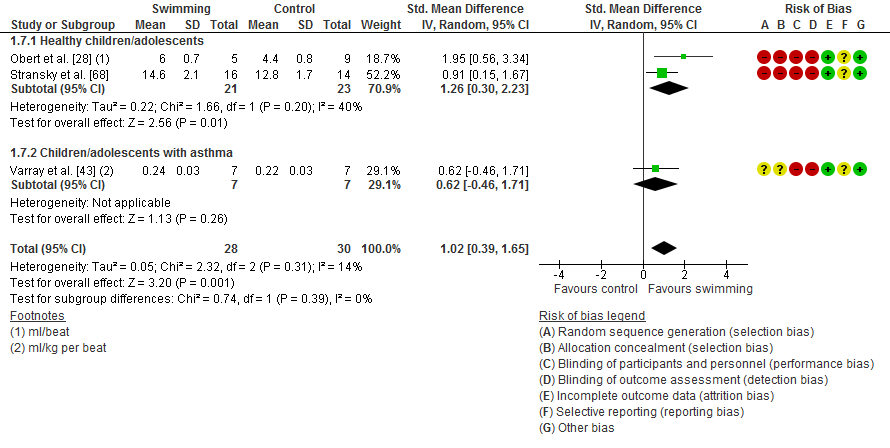


**Electronic Supplementary Material Figure S8.** Effect of swimming versus control on Submaximal exercise performance (post-intervention follow-up values analysis). (SD: standard deviation, IV: inverse variance, CI: confidence interval, std. mean difference: standardised mean difference)


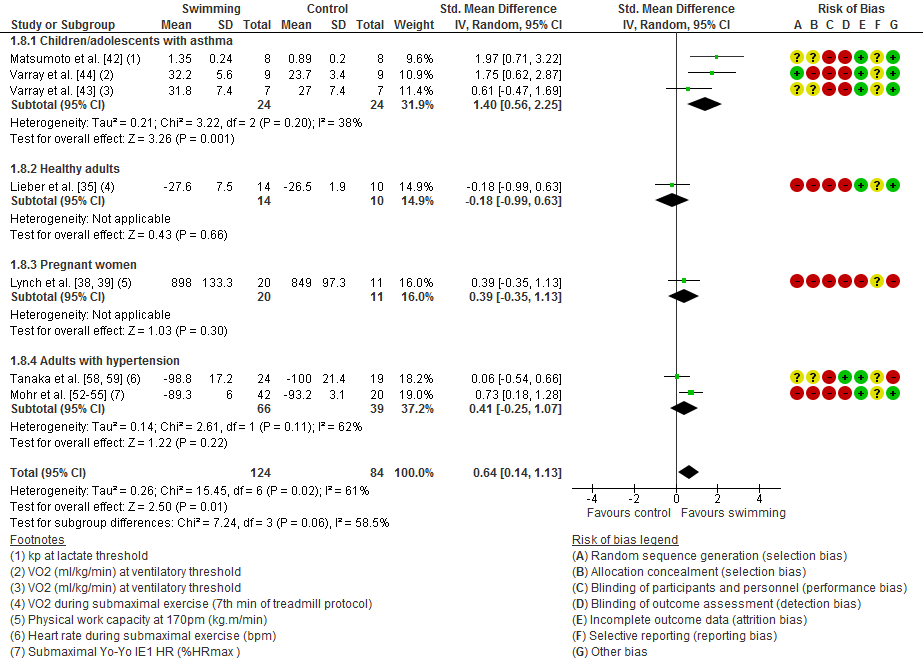


**Electronic Supplementary Material Figure S9.** Effect of swimming versus control on maximal exercise time tests (post-intervention follow-up values analysis). (SD: standard deviation, IV: inverse variance, CI: confidence interval)

**
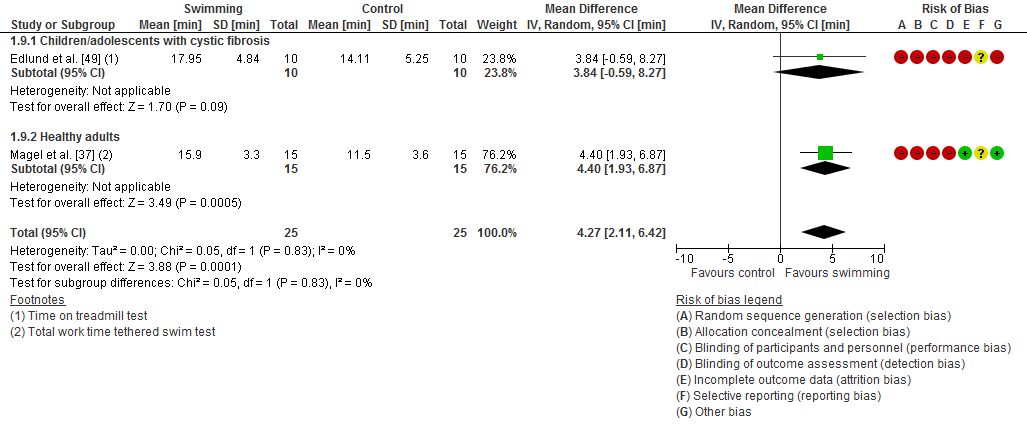
**

**Electronic Supplementary Material Figure S10.** Effect of swimming versus control/other exercise modes on maximal exercise distance covered tests (post-intervention follow-up values analysis). (SD: standard deviation, IV: inverse variance, CI: confidence interval)

**
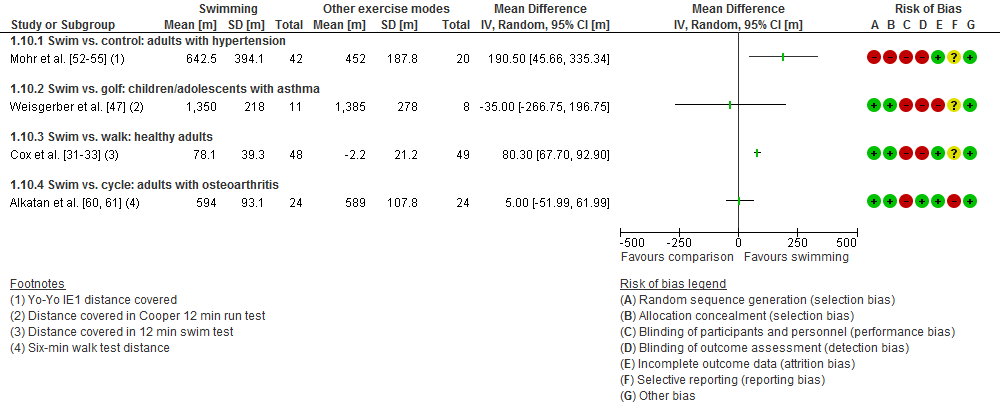
**

**Electronic Supplementary Material Figure S11.** Effect of swimming versus control on quadriceps peak torque (nM/kg) (post-intervention follow-up values analysis). (SD: standard deviation, IV: inverse variance, CI: confidence interval)

**
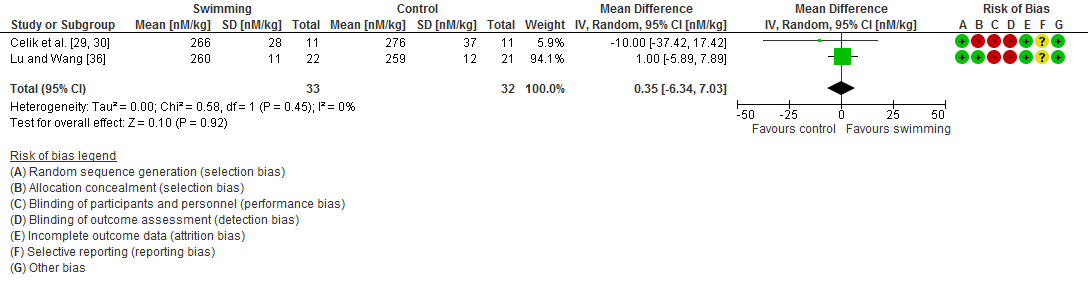
**

**Electronic Supplementary Material Figure S12.** Effect of swimming versus other modes of exercise on quadriceps peak torque (nM/kg or nM) (post-intervention follow-up values analysis). (SD: standard deviation, IV: inverse variance, CI: confidence interval)

**
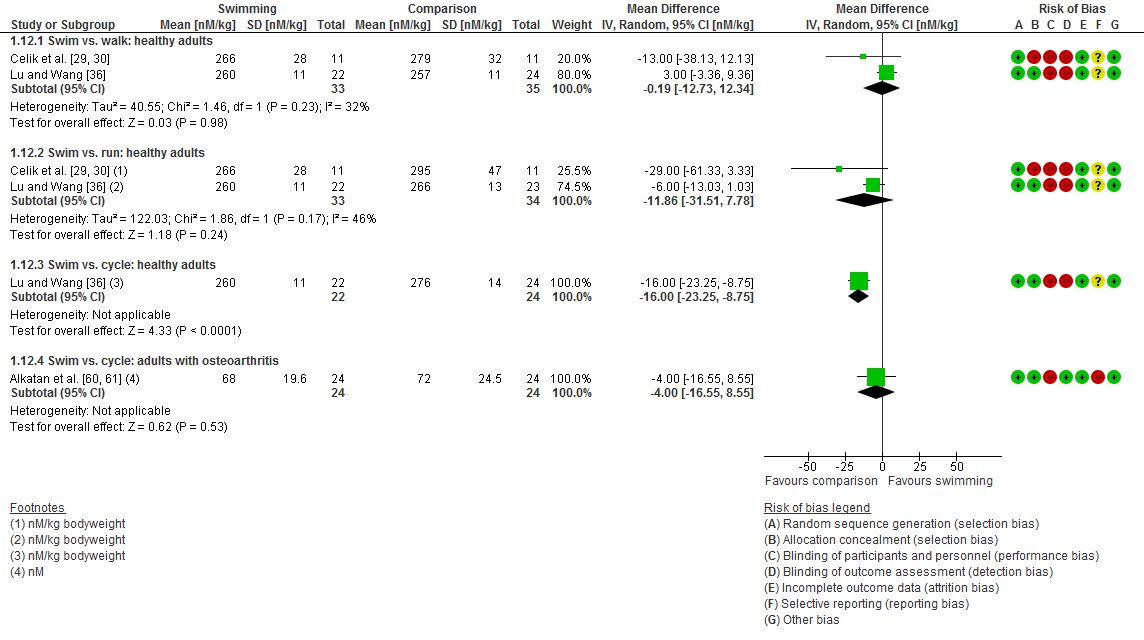
**

**Electronic Supplementary Material Figure S13.** Effect of swimming versus control on resting heart rate (bpm) in adults with hypertension (post-intervention follow-up values analysis). (SD: standard deviation, IV: inverse variance, CI: confidence interval)


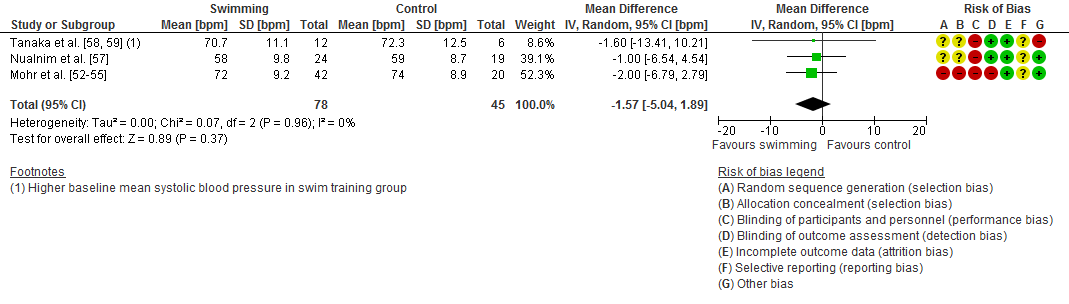


**Electronic Supplementary Material Figure S14.** Effect of swimming versus other exercise modes on resting heart rate (bpm) (combined change from baseline to end of intervention and post-intervention follow-up values analysis). (SD: standard deviation, IV: inverse variance, CI: confidence interval, change values: change from baseline to end of intervention)


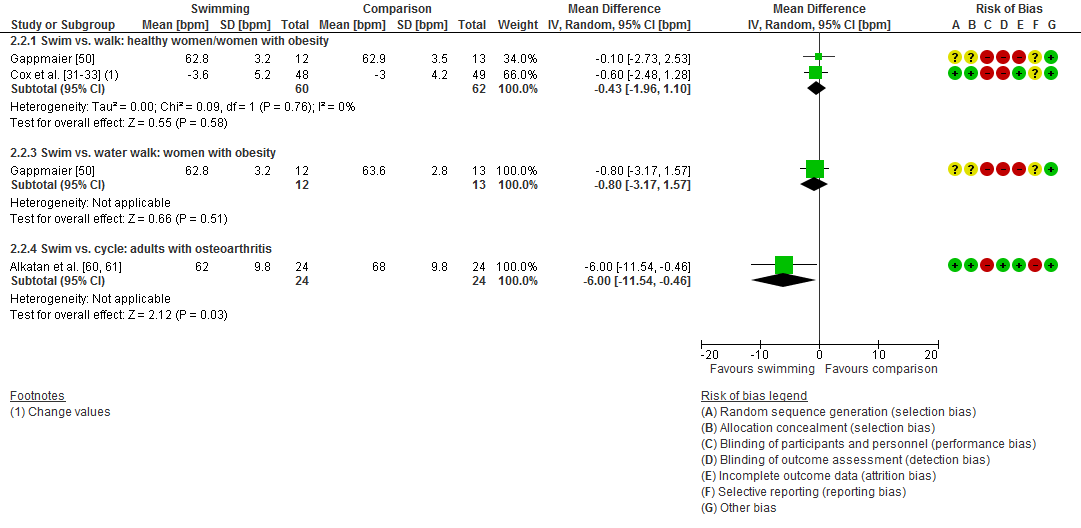


**Electronic Supplementary Material Figure S15.** Effect of swimming versus control on resting systolic blood pressure (mmHg) in adults with hypertension (post-intervention follow-up values analysis). (SD: standard deviation, IV: inverse variance, CI: confidence interval)


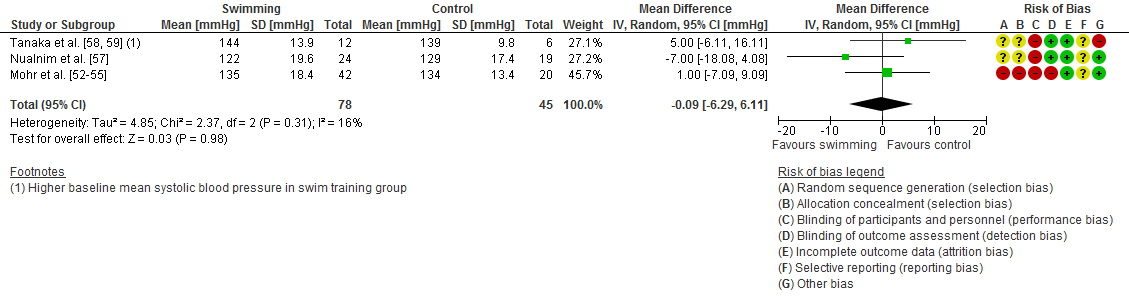


**Electronic Supplementary Material Figure S16.** Effect of swimming versus control on resting diastolic blood pressure (mmHg) in adults with hypertension (post-intervention follow-up values analysis). (SD: standard deviation, IV: inverse variance, CI: confidence interval)


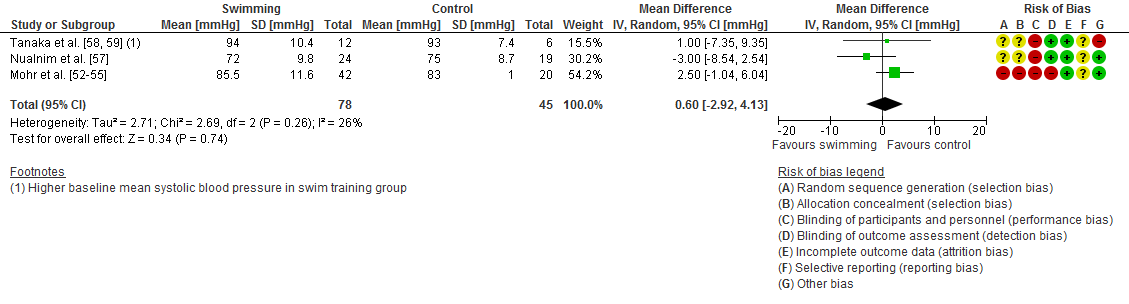


**Electronic Supplementary Material Figure S17.** Effect of swimming versus control on resting mean arterial pressure (mmHg) in adults with hypertension (post-intervention follow-up values analysis). (SD: standard deviation, IV: inverse variance, CI: confidence interval)


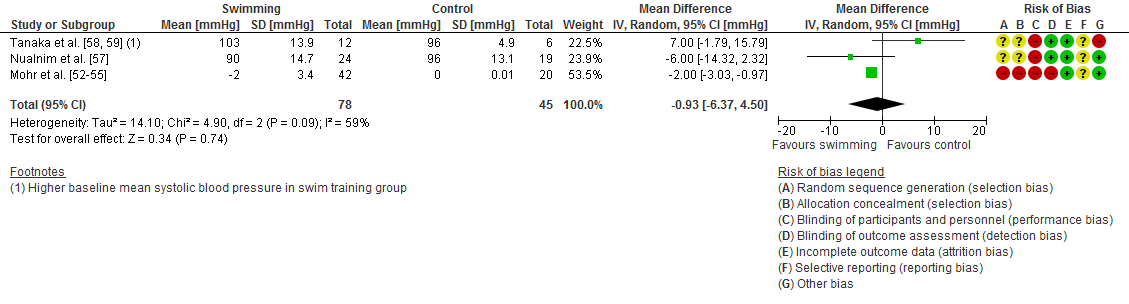


**Electronic Supplementary Material Figure S18.** Effect of swimming versus control on forced expiratory volume in one second (FEV1, L) (combined change from baseline to end of intervention and post-intervention follow-up values analysis). (SD: standard deviation, IV: inverse variance, CI: confidence interval, change values: change from baseline to end of intervention)


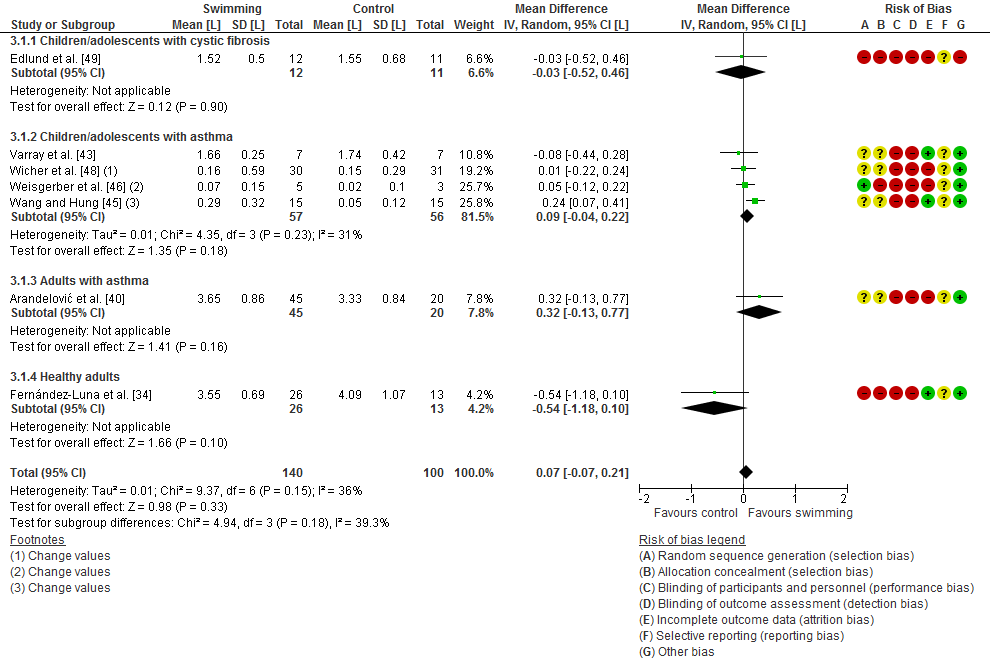


**Electronic Supplementary Material Figure S19.** Effect of swimming versus control on FEV1 % of predicted (%) in children/adolescents with asthma (combined change from baseline to end of intervention and post-intervention follow-up values analysis). (SD: standard deviation, IV: inverse variance, CI: confidence interval, change values: change from baseline to end of intervention)


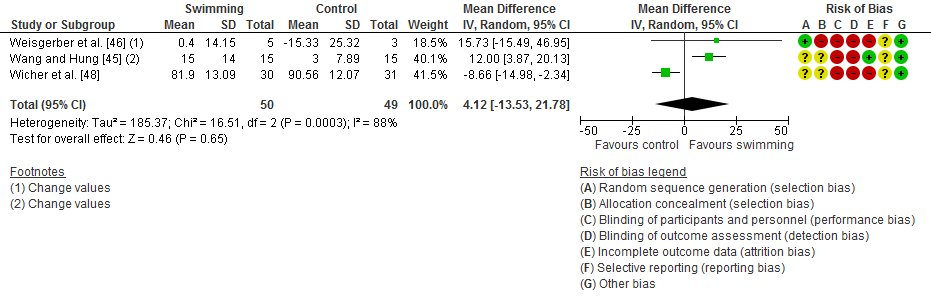


**Electronic Supplementary Material Figure S20.** Effect of swimming versus control on forced vital capacity (FVC, L) (combined change from baseline to end of intervention and post-intervention follow-up values analysis). (SD: standard deviation, IV: inverse variance, CI: confidence interval, change values: change from baseline to end of intervention)


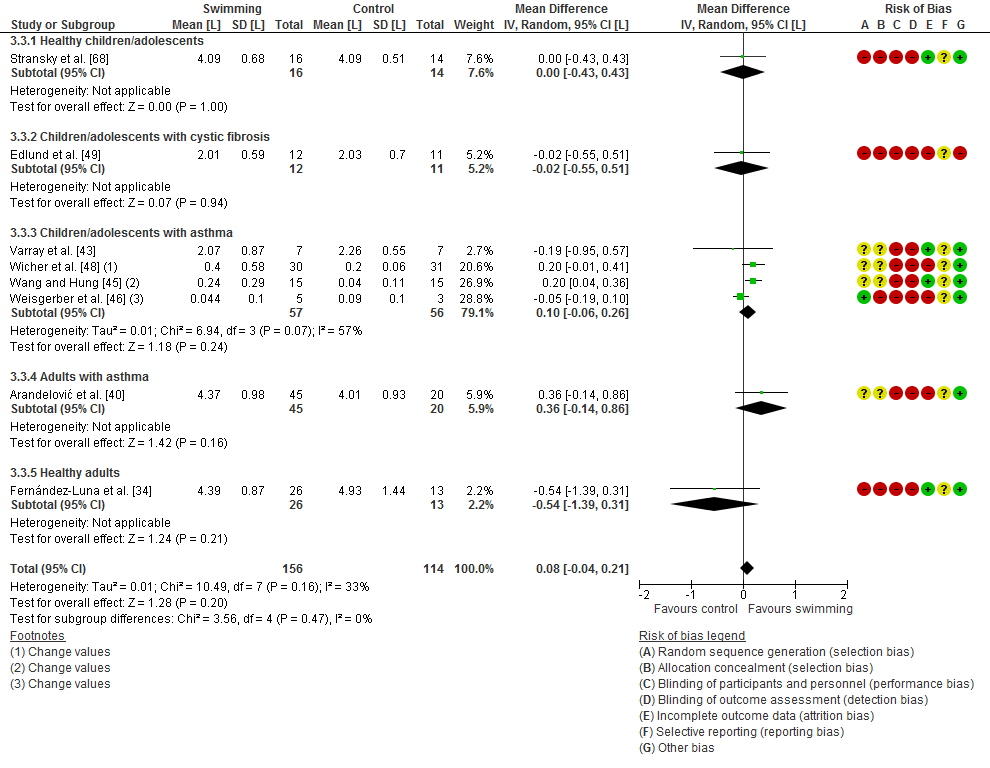


**Electronic Supplementary Material Figure S21.** Effect of swimming versus control on FVC % of predicted (%) in children/adolescents with asthma (change from baseline to end of intervention values analysis). (SD: standard deviation, IV: inverse variance, CI: confidence interval)


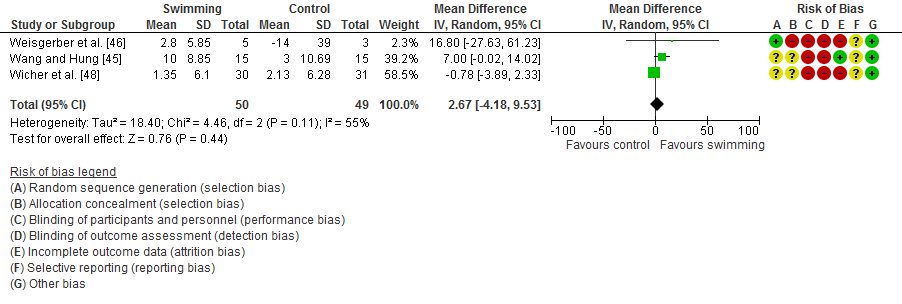


**Electronic Supplementary Material Figure S22.** Effect of swimming versus control on FEV1/FVC in children/adolescents with asthma (post-intervention values analysis). (SD: standard deviation, IV: inverse variance, CI: confidence interval)


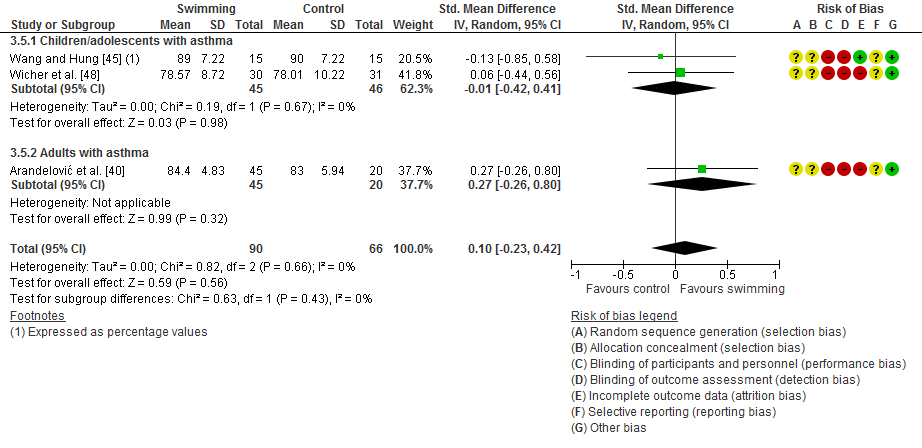


**Electronic Supplementary Material Figure S23.** Effect of swimming versus control on forced expiratory flow between 25-75% % of predicted (%) in children/adolescents with asthma (change from baseline to end of intervention values analysis). (SD: standard deviation, IV: inverse variance, CI: confidence interval)


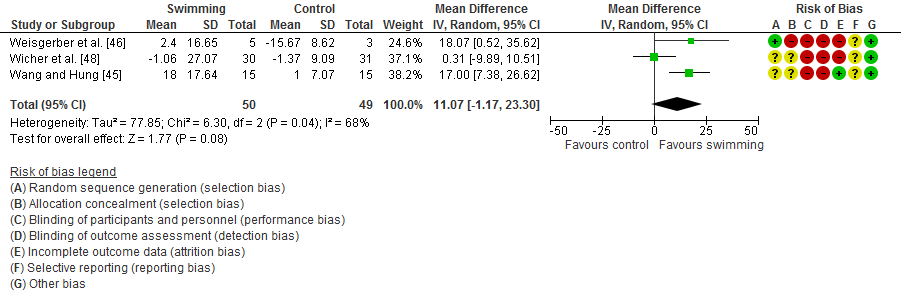


**Electronic Supplementary Material Figure S24.** Effect of swimming versus control on peak expiratory flow (L/min) (post-intervention values analysis). (SD: standard deviation, IV: inverse variance, CI: confidence interval)


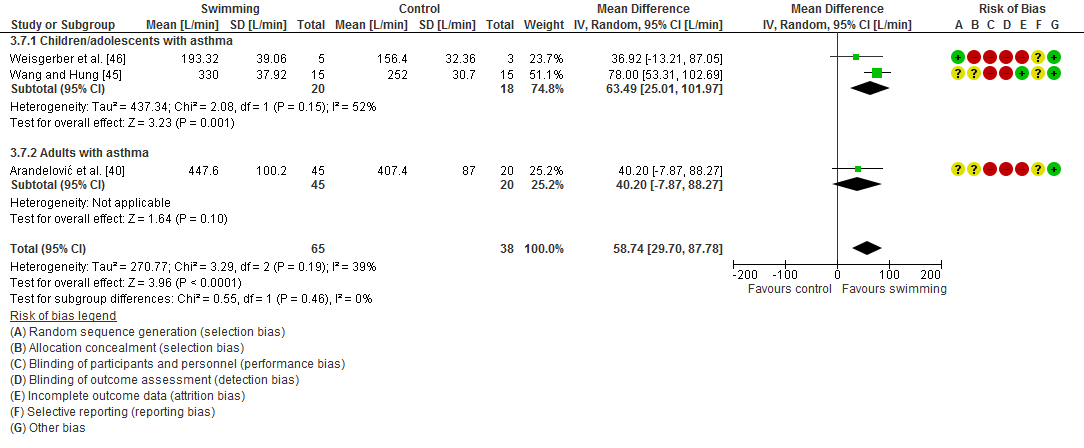


**Electronic Supplementary Material Figure S25.** Effect of swimming versus control on total cholesterol (mmol/L) in adults with hypertension (post-intervention values analysis). (SD: standard deviation, IV: inverse variance, CI: confidence interval)


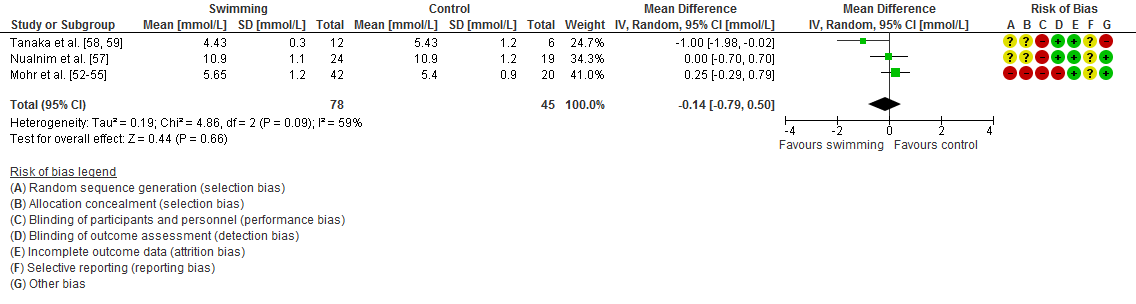


**Electronic Supplementary Material Figure S26.** Effect of swimming versus control on low-density lipoprotein (LDL) cholesterol (mmol/L) in adults with hypertension (post-intervention values analysis). (SD: standard deviation, IV: inverse variance, CI: confidence interval)

**
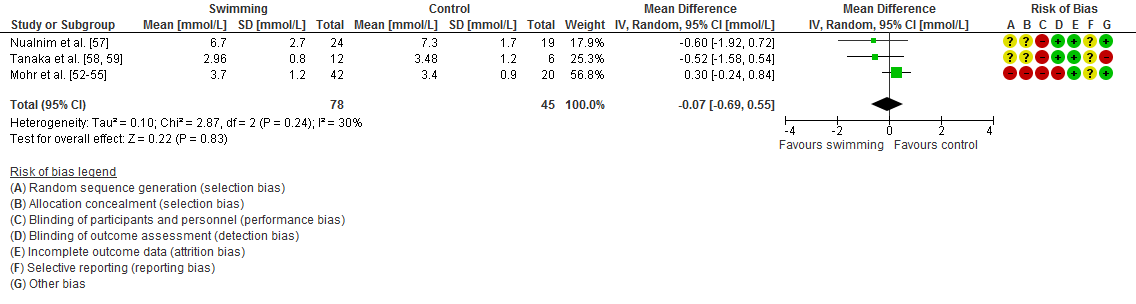
**

**Electronic Supplementary Material Figure S27.** Effect of swimming versus control on high-density lipoprotein (HDL) cholesterol (mmol/L) in adults with hypertension (post-intervention values analysis). (SD: standard deviation, IV: inverse variance, CI: confidence interval)

**
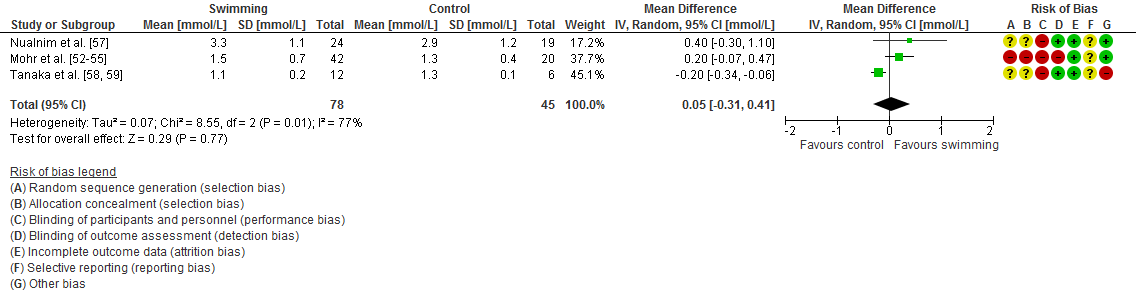
**

**Electronic Supplementary Material Figure S28.** Effect of swimming versus control on triglycerides (mmol/L) in adults with hypertension (post-intervention values analysis). (SD: standard deviation, IV: inverse variance, CI: confidence interval)


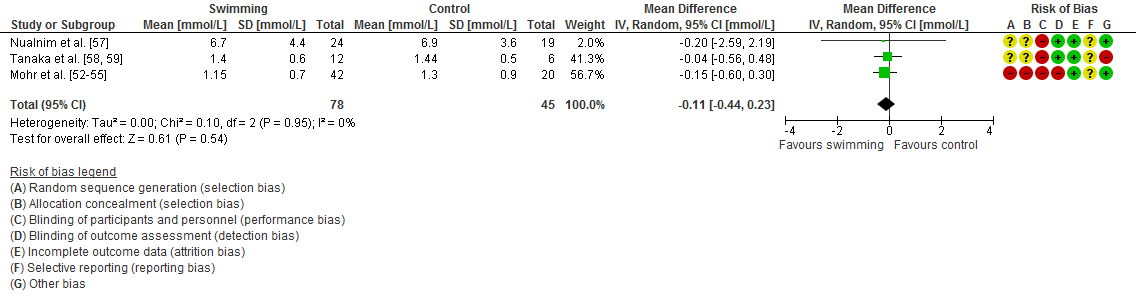


**Electronic Supplementary Material Figure S29.** Effect of swimming versus control on plasma glucose (mmol/L) in adults with hypertension (post-intervention values analysis). (SD: standard deviation, IV: inverse variance, CI: confidence interval)


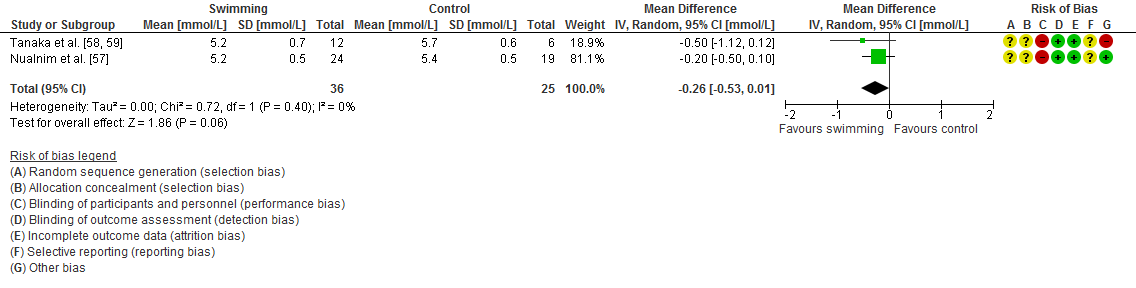


**Electronic Supplementary Material Figure S30.** Effect of swimming versus control on body mass (kg) (combined change from baseline to end of intervention and post-intervention follow-up values analysis). (SD: standard deviation, IV: inverse variance, CI: confidence interval, change values: change from baseline to end of intervention)


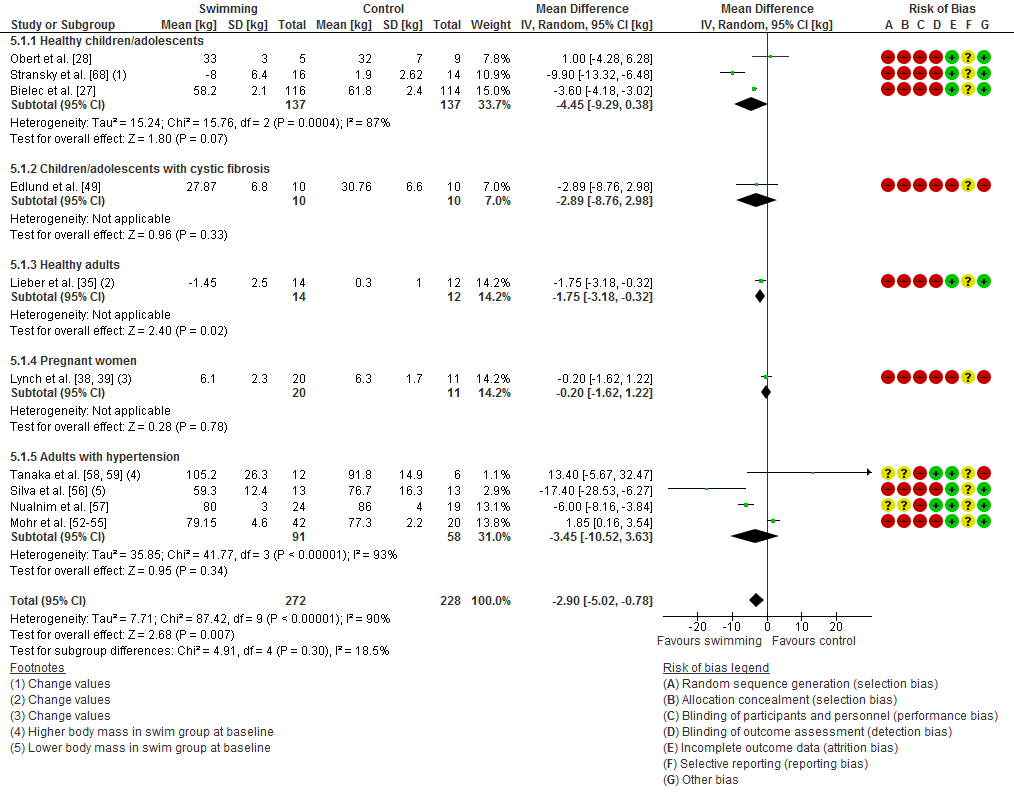


**Electronic Supplementary Material Figure S31.** Effect of swimming versus walking on body mass (kg) (change from baseline to end of intervention values analysis). (SD: standard deviation, IV: inverse variance, CI: confidence interval)


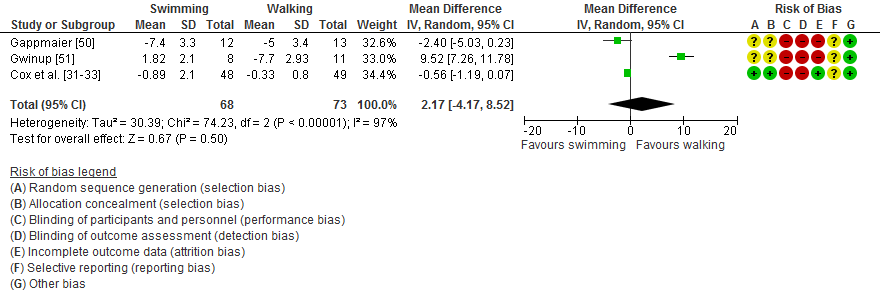


**Electronic Supplementary Material Figure S32.** Effect of swimming versus control on body mass index (BMI, kg/m2) (post-intervention values analysis). (SD: standard deviation, IV: inverse variance, CI: confidence interval)


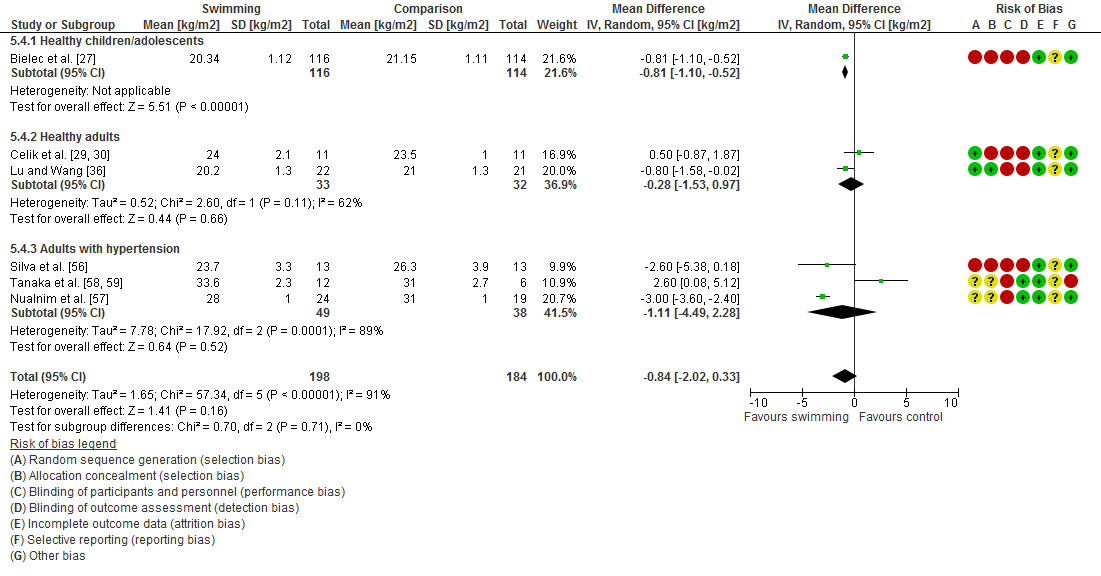


**Electronic Supplementary Material Figure S33.** Effect of swimming versus other exercise modes on body mass index (BMI, kg/m2) (post-intervention follow-up values analysis). (SD: standard deviation, IV: inverse variance, CI: confidence interval)


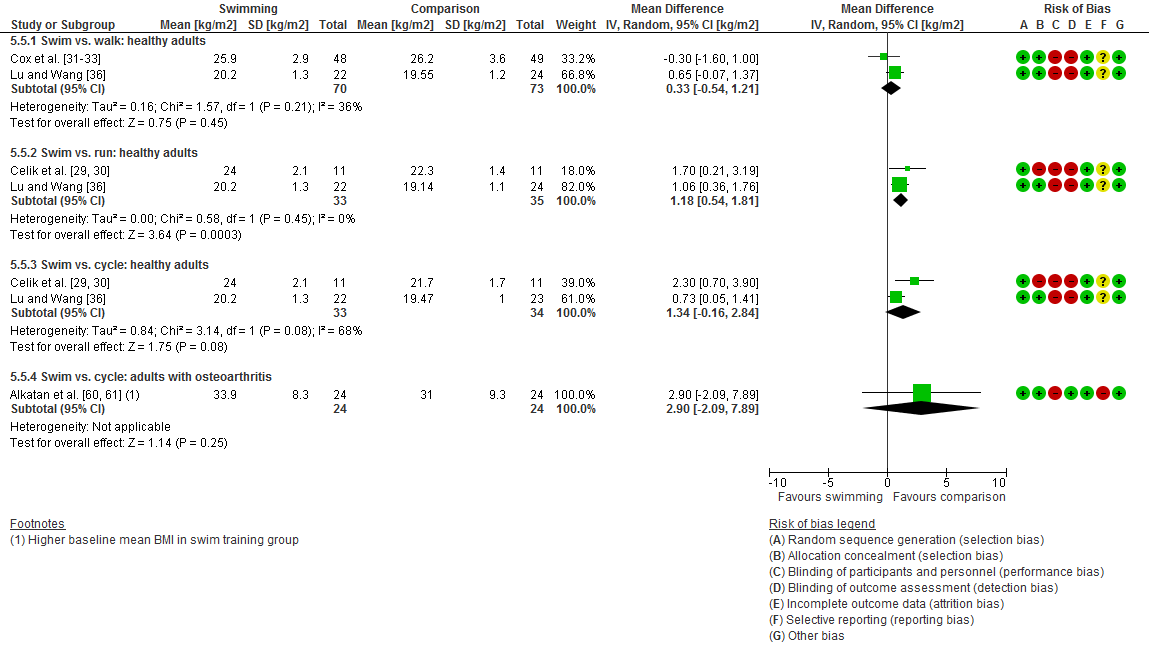


**Electronic Supplementary Material Figure S34.** Effect of swimming versus other exercise modes on body fat (%) (combined change from baseline to end of intervention and post-intervention follow-up values analysis). (SD: standard deviation, IV: inverse variance, CI: confidence interval, change values: change from baseline to end of intervention)
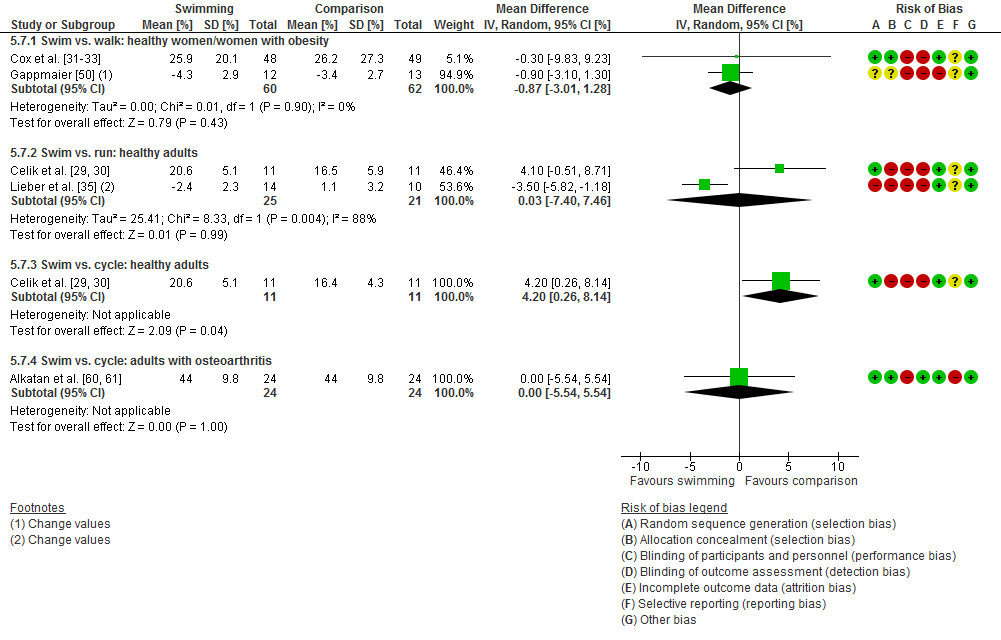


**Electronic Supplementary Material Figure S35.** Effect of swimming versus control on lean body mass (kg) (combined change from baseline to end of intervention and post-intervention follow-up values analysis). (SD: standard deviation, IV: inverse variance, CI: confidence interval, change values: change from baseline to end of intervention)


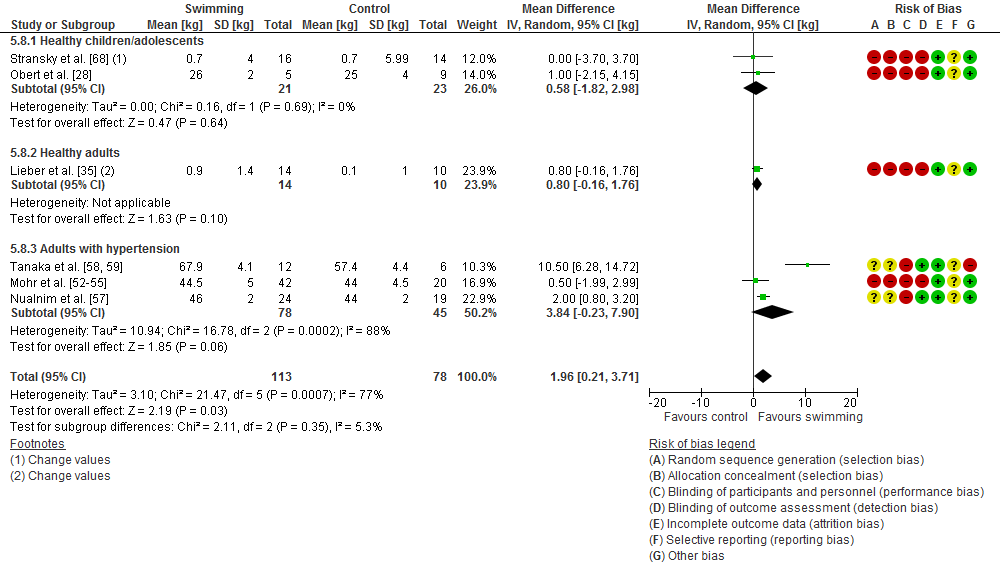


**Electronic Supplementary Material Figure S36.** Effect of swimming versus control on waist circumference (cm) in adults with hypertension (post-intervention follow-up values analysis). (SD: standard deviation, IV: inverse variance, CI: confidence interval)


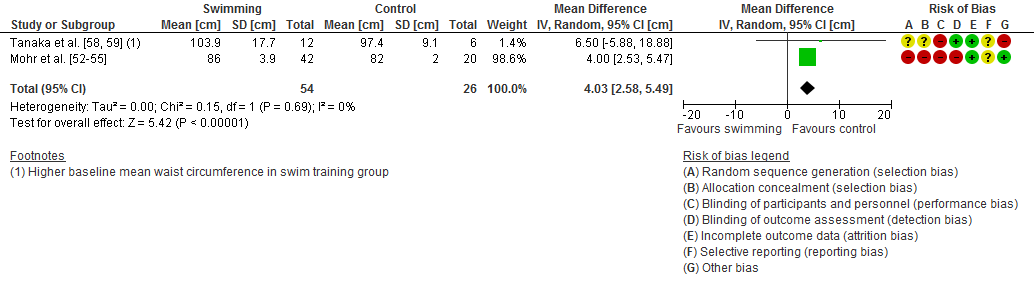


**Electronic Supplementary Material Figure S37.** Effect of swimming versus other exercise modes on waist circumference (cm) (combined change from baseline to end of intervention and post-intervention follow-up values analysis). (SD: standard deviation, IV: inverse variance, CI: confidence interval, change values: change from baseline to end of intervention)


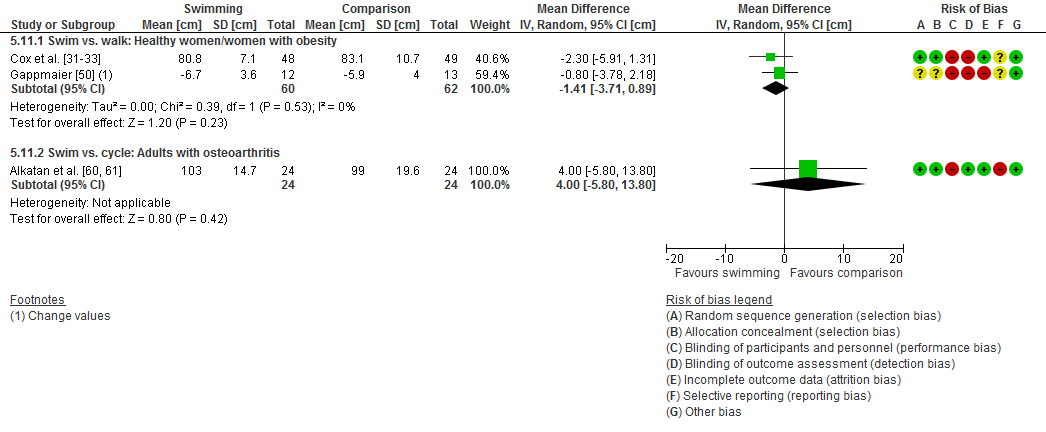


**Electronic Supplementary Material Figure S38.** Effect of swimming versus control on hip circumference (cm) in adults with hypertension (post-intervention follow-up values analysis). (SD: standard deviation, IV: inverse variance, CI: confidence interval)


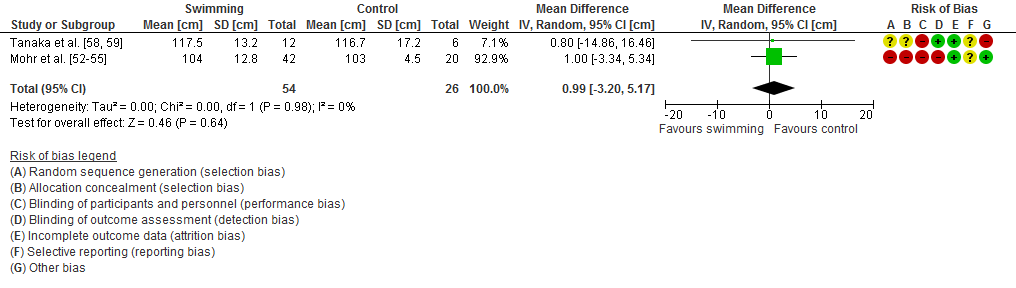


**Electronic Supplementary Material Figure S39.** Effect of swimming versus other exercise modes on hip circumference (cm) (combined change from baseline to end of intervention and post-intervention follow-up values analysis). (SD: standard deviation, IV: inverse variance, CI: confidence interval, change values: change from baseline to end of intervention)


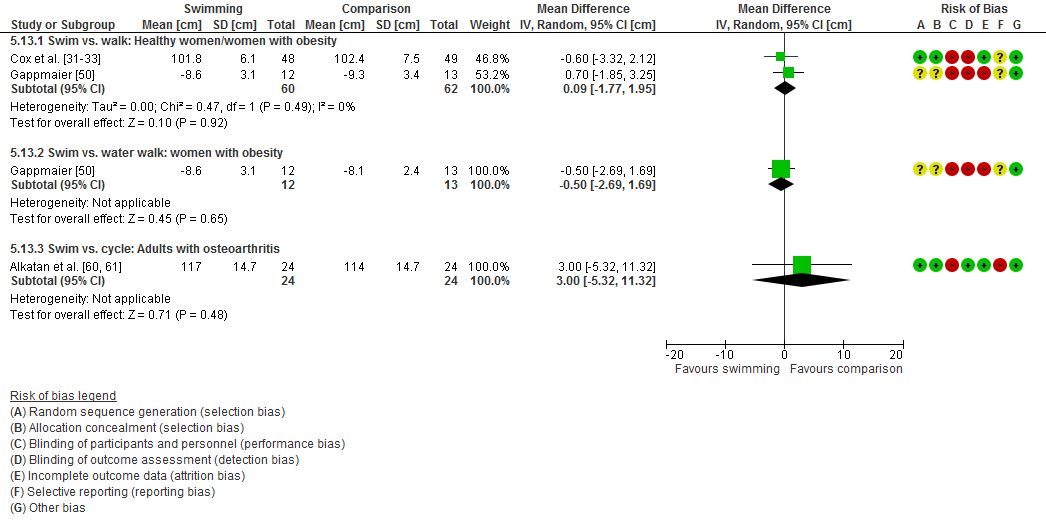


**Electronic Supplementary Material Figure S40.** Effect of swimming versus walking on thigh circumference (cm) (combined change from baseline to end of intervention and post-intervention follow-up values analysis). (SD: standard deviation, IV: inverse variance, CI: confidence interval, change values: change from baseline to end of intervention)


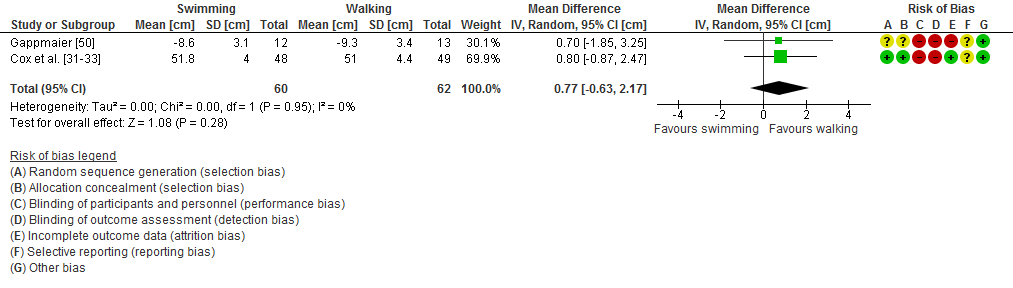

Supplement: MOESM1 [file 15177628]
